# Supplementary material for: Magnaporthe oryzae Chloroplast Targeting Endo-β-1,4-Xylanase I MoXYL1A Regulates Conidiation, Appressorium Maturation and Virulence of the Rice Blast Fungus
Source: PubMed Central journal article supplement (PMC9374862; doi:10.1186/s12284-022-00584-2), 2022-08-12
Supplement: 12284_2022_584_MOESM1_ESM.pdf [file 12284_2022_584_MOESM1_ESM.pdf]

### Additional information

**Table S1. List of primers used in this study**

| <b>Primer Name</b> | <b>Sequence</b>               |
|--------------------|-------------------------------|
| MoXYL1A-AF         | 5' CGACCGAACCAGGATTTGC 3'     |
| MoXYL1A-AR         | 5' GAAGATGTTTGAACCGCACC 3'    |
| MoXYL1A-BF         | 5' CGGCGAGTTGATGTTGA 3'       |
| MoXYL1A-BR         | 5' CAAGGGCATAGAAGCGAAT 3'     |
| MoXYL1A-OF         | 5' GCAGCTCATGCGGCGACAGT 3'    |
| MoXYL1A-OR         | 5' CCCTCGGTGGCGACAATC 3'      |
| MoXYL1A-UF         | 5' CACTTGCGTTAGCCTGAG 3'      |
| MoXYL1A-UR         | 5' CACAGTTTGCCAGTGATACA 3'    |
| MoXYL1A-COMP-F     | 5'AACATCAGGCAGCTCGTA 3'       |
| MoXYL1A-COMP-R     | 5'CGCCGGAGTCTGAACGTTGA 3'     |
| MoXYL1A-qPCR-F     | 5' ATGGCAACATGACGGGATTC 3'    |
| MoXYL1A-qPCR-R     | 5' ACTGCCACTGAACGCTGTAG 3'    |
| MoXYL1A-pGDG-F     | 5' ATGGTCTCCTTCACCTCCATC 3'   |
| MoXYL1A-pGDG-R     | 5' TCACGCCGGAGTCTGAA 3'       |
| MoXYL1A-Y2H-F      | 5' ATGGTCTCCTTCACCTCCATC 3'   |
| MoXYL1A-Y2H-R      | 5' TCACGCCGGAGTCTGAA 3'       |
| MoXYL1B-AF         | 5' ACGAGGTGATTTACTTTGGG 3'    |
| MoXYL1B-AR         | 5' TCTGGCTCTATGATGTATGTCTT 3' |
| MoXYL1B-BF         | 5' GCGAGATCGACTGTAACAAACC 3'  |
| MoXYL1B-BR         | 5' ACGGAGGAAAGTGACCTACCATT 3' |
| MoXYL1B-OF         | 5' GGGGAGTGCTCGGTATGTTT 3'    |
| MoXYL1B-OR         | 5' GGCGACGATCTGGTAGTCGT 3'    |
| MoXYL1B-UF         | 5' TTCAGACAAGACGCAACCC 3'     |
| MoXYL1B-UR         | 5' GCTCCATACAAGCCAACCAC 3'    |
| MoXYL1B-COMP-F     | 5'AACATCAGGCAGCTCGTA 3'       |
| MoXYL1B-COMP-R     | 5'CGCCGGAGTCTGAACGTTGA 3'     |

|                |                              |
|----------------|------------------------------|
| MoXYL1B-qPCR-F | 5' ATGGCAACATGACGGGATTC 3'   |
| MoXYL1B-qPCR-R | 5' ACTGCCACTGAACGCTGTAG 3'   |
| MoXYL1B-pGDG-F | 5' ATGGTCTCCTTCACCAC 3'      |
| MoXYL1B-pGDG-R | 5' TCACCGCTGGATGGTGA 3'      |
| MoXYL1B-Y2H-F  | 5' ATGGTCTCCTTCACCAC 3'      |
| MoXYL1B-Y2H-R  | 5' TCACCGCTGGATGGTGA 3'      |
| Os-CH-pGDR-F   | 5' ATGTCGTCGGTGCAGCT 3'      |
| Os-CH-pGDR-R   | 5' TCAAGATAGGACAGCCATCA 3'   |
| G418-F2        | 5' CAACAACACGCATCATCCCA 3'   |
| G418-R2        | 5' TCAGAAGAAGTTCGTCAGAA 3'   |
| rice-actin-F   | 5' GCGTGGACAAAGTTTTCAACCG 3' |
| rice-actin-R   | 5' TCTGGTACCCTCATCAGGCATC 3' |
| OsPR1a-RT-F    | 5' GGAAGTACGGCGAGAACATC 3'   |
| OsPR1a-RT-R    | 5' GGCGAGTAGTTGCAGGTGAT 3'   |
| OsCht1-RT-F    | 5' CGTGGTGACCAACATCATCA 3'   |
| OsCht1-RT-R    | 5' GAGTTGAAAGGCCTCTGGTTGT 3' |
| OsPBZ1-F       | 5' CTGTGGAAGGTCTGCTTGGA 3'   |
| OsPBZ1-R       | 5' TCTTGTATACGCTCCCTGCG 3'   |
| OsPAL-F        | 5' GAGATCAACTCCGTCAAC 3'     |
| OsPAL-R        | 5' TGTAGAAGTCGTTACCA 3'      |
| OsPR1a-F       | 5' GTCGGAGAAGCAGTGGTA 3'     |
| OsPR1a-R       | 5' CGAGTAGTTGCAGGTGATG 3'    |
| OsPR5-F        | 5' CAGCCAGGACTTCTACGA 3'     |
| OsPR5-R        | 5' TGTGTCTTGGTGTGTCTTC 3'    |
| OsKSL7-F       | 5' CCATATCCACAGCCAACA 3'     |
| OsKSL7-R       | 5' ACTTAGTCCTCTCCTGATGT 3'   |
| OsKSL10-F      | 5' TAACCCTTGCCTCTGGGATG 3'   |
| OsKSL10-R      | 5' ATTGTTCCACCGGAATCCCT 3'   |
| OsKOL4-F       | 5' GTGCACAGCTGACAGATGAC 3'   |

|             |                              |
|-------------|------------------------------|
| OsKOL4-R    | 5' TCGGATCTCTTGGTAGAGTAGC 3' |
| OsCYP76M8-F | 5' ATGGAGAATAGCCAGATGTG 3'   |
| OsCYP76M8-R | 5' AAGTGTAGGTTGCCGATG 3'     |
| OsNOMT-F    | 5' GAAGGTGTGGAGCATATCGG 3'   |
| OsNOMT-R    | 5' GTGCAGAATCCACTTGAGC 3'    |

**Table S2. Predicted location of pathogenicity-related protein in rice.**

| Pathogenicity-related genes in rice                          | Abbreviated annotation | Gene accession number ( Gene ID) | Predicted localization                                         |
|--------------------------------------------------------------|------------------------|----------------------------------|----------------------------------------------------------------|
| Probenazole-inducible protein                                | OsPBZ1                 | Os12g0555200                     | Extracellular, Mitochondrial, ER, Peroxisomal, Chloroplast     |
| Pathogenesis-related protein 1a                              | OsPR1a                 | Os07g0129200-01                  | Extracellular, and Mitochondrial                               |
| Thaumatococcus-like pathogenesis-related protein 3 precursor | OsPR5                  | Os12g0628600                     | Vacuolar, and Extracellular                                    |
| ent kaurene synthase 7                                       | OsKSL7                 | Os02g0570400                     | Extracellular, and Vacuolar                                    |
| kaurene synthase like 10                                     | OsKSL10                | Os12g0491800                     | Cytoplasmic, Mitochondrial, and Chloroplast                    |
| Ent-kaurene oxidase 4                                        | OsKOL4                 | Os06g0569500                     | Mitochondrial, Peroxisomal, and Chloroplast                    |
| Cytochrome P450 family protein                               | OsCYP76M8              | Os02g0569400                     | Plasma membrane, Mitochondrial, and ER                         |
| naringenin 7-O-methyltransferase                             | OsNOMT                 | Os12g0240900                     | Extracellular, Mitochondrial, ER, Peroxisomal, and Chloroplast |
| Chitinase 1                                                  | OsCHT1                 | Os06g0726200                     | Extracellular, Vacuolar                                        |

## Additional figures

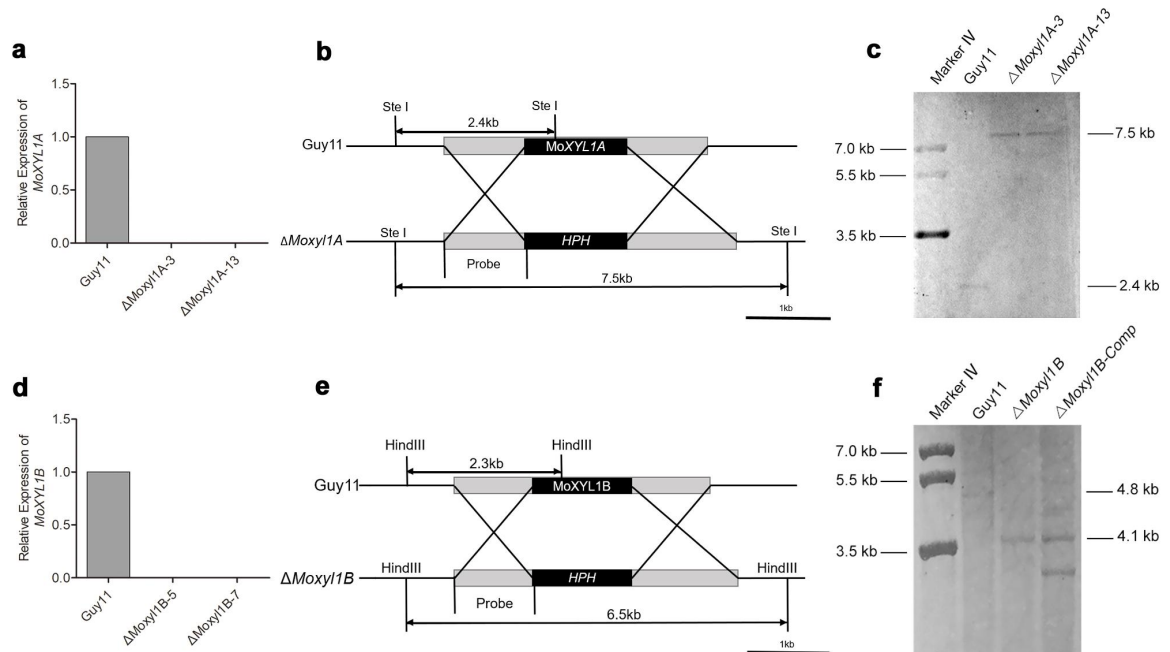

**Figure S1. Single copy insertions confirmed by Southern Blot and relative expression of *MoXYL1A* gene in Guy11 and the two putative mutant strains was assessed by qRT-PCR. (a) Schematic of probe design for Southern blot for *MoXYL1A* gene. (b) Successful gene replacement of *MoXYL1A* by single insertion of *hph* at the *MoXYL1A* locus by Southern blot analysis. (c) The relative expression of *MoXYL1A* gene in Guy11 and the putative mutant strains was assessed by qRT-PCR. (d) Schematic of probe design for Southern blot for *MoXYL1B* gene (e) Successful gene replacement of *MoXYL1B* by single insertion of *hph* at the *MoXYL1B* locus by Southern blot analysis. (f) The relative expression of *MoXYL1B* gene in Guy11 and the putative mutant strains was assessed by qRT-PCR.**

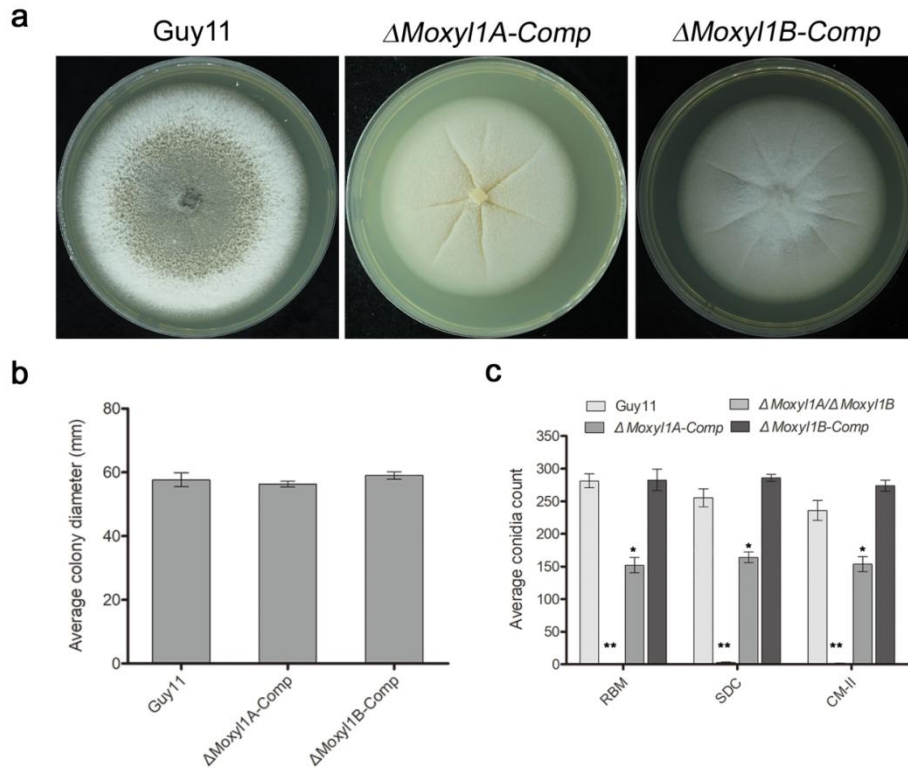

**Figure S2. Complementation of MoXYL1A and MoXYL1B rescued the defects exhibited by the mutant strains (a)** Photographs showing colony growth diameter (mm) of complemented deletion strains for *MoXYL1A*&*B* compared to WT. (b-c) Quantification of colony growth in (a) Quantification of conidiation in the complemented strains and the double mutant.

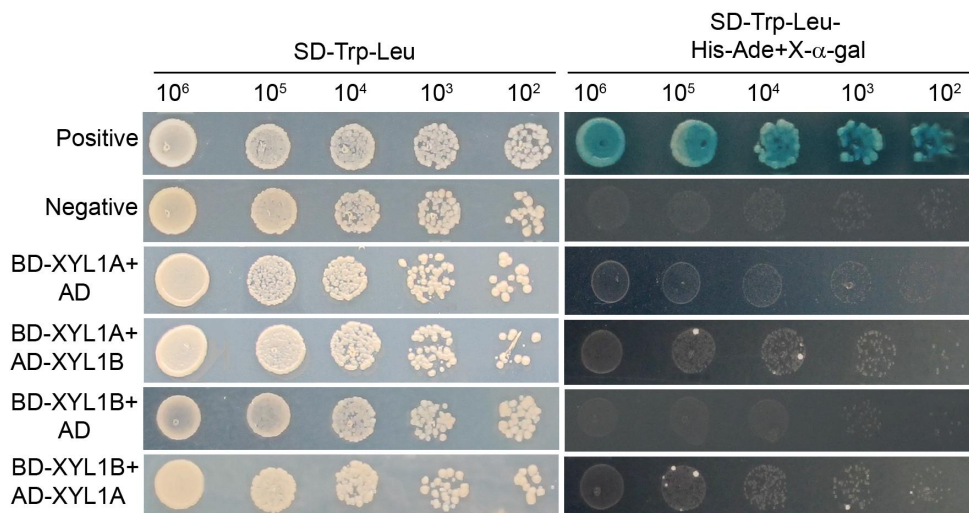

**Figure S3. Interaction in Y2H and in-planta expression of putative *M. oryzae* xylanases 1A and B**

(a) Yeast-2-hybrid experiments to assess interaction between the xylanases 1A and B in *M. oryzae* did not show physical interaction between the two proteins.
